# Supplementary material for: Circadian disruption and ROS-NLRP3 signaling mediate sleep deprivation-enhanced silica nanoparticle toxicity in lacrimal glands
Source: J Nanobiotechnology. 2025 Sep 2;23:600. doi: 10.1186/s12951-025-03630-5 (PMC12403269; doi:10.1186/s12951-025-03630-5)
Supplement: Supplementary file 1 — Table S1 [file 12951_2025_3630_MOESM1_ESM.xlsx]

## Sheet: Sheet1
Table S1. Top 10 DEGs in ELGs between NC and SiNPs, including gene names, fold changes, and statistical significance values.
GeneID	Gene Name	log2FC	p_val	p_val_adj	ZT time	Mark
1	Amy1	-6.42986	0.000129	0.016891	0	adjust P-val>=0.01
2	Krt6b	4.9519	0.00169944	0.104147	0	adjust P-val>=0.01
3	Myh6	-7.23311	0.0353221	0.63994	0	adjust P-val>=0.01
4	Pln	-4.97253	0.00169106	0.104147	0	adjust P-val>=0.01
5	Bpifa2	-9.95012	1.33e-06	0.000527	0	adjust P-val<0.01
6	Smr3a	-7.59814	9.75e-05	0.0140993	0	adjust P-val>=0.01
7	Tmod1	-5.02346	0.00199991	0.114363	0	adjust P-val>=0.01
8	Inafm1	7.10735	0.0691476	0.871892	0	adjust P-val>=0.01
9	Lypd2	6.08323	9.95e-05	0.0140993	0	adjust P-val>=0.01
10	Chia1	-9.66457	0.000488	0.0468325	0	adjust P-val>=0.01
11	LOC115490184	-7.81331	0.0456483	0.498407	3	adjust P-val>=0.01
12	Crisp1	-5.33326	0.00011	0.013058	3	adjust P-val>=0.01
13	Amy1	-10.3443	8.79e-09	4.71e-06	3	adjust P-val<0.01
14	Aff2	6.28458	1.33e-05	0.00250458	3	adjust P-val<0.01
15	Bpifa2	-12.8174	6.66e-08	3.08e-05	3	adjust P-val<0.01
16	Smr3a	-11.6756	5.38e-07	0.000196	3	adjust P-val<0.01
17	Zfp781	7.0441	8.13e-08	3.57e-05	3	adjust P-val<0.01
18	Gbp10	5.37542	0.000358	0.029886	3	adjust P-val>=0.01
19	Inafm1	-6.3691	9.8e-07	0.000323	3	adjust P-val<0.01
20	Chia1	-14.1735	4.7e-07	0.000175	3	adjust P-val<0.01
21	Cstdc5	-4.51683	0.016588	0.437603	6	adjust P-val>=0.01
22	Ccl27b	-4.43354	0.00892581	0.341638	6	adjust P-val>=0.01
23	Gm40595	4.52297	0.0535141	0.660098	6	adjust P-val>=0.01
24	H2-Q9	4.43588	0.000103	0.0284644	6	adjust P-val>=0.01
25	Upk1b	-4.89791	0.000278	0.0534853	6	adjust P-val>=0.01
26	Xlr3a	5.51338	0.0205593	0.479054	6	adjust P-val>=0.01
27	Hist1h4n	-4.60189	0.0113412	0.382861	6	adjust P-val>=0.01
28	Tmprss11g	-4.50656	0.1266	0.824915	6	adjust P-val>=0.01
29	Scgb2b10	-5.20443	0.00110351	0.111896	6	adjust P-val>=0.01
30	Gvin1	7.96169	0.0416698	0.610204	6	adjust P-val>=0.01
31	Gm3373	-4.42805	0.0273124	0.592649	9	adjust P-val>=0.01
32	Gm2897	-4.47959	0.01594	0.457147	9	adjust P-val>=0.01
33	LOC108167347	5.35997	0.171241	0.996122	9	adjust P-val>=0.01
34	LOC115489314	5.57229	0.000213	0.0262	9	adjust P-val>=0.01
35	Cnga3	-4.32803	0.0211938	0.526655	9	adjust P-val>=0.01
36	Ccn3	4.43875	0.0124423	0.392662	9	adjust P-val>=0.01
37	Gpat2	5.33312	0.00112277	0.0856852	9	adjust P-val>=0.01
38	Ceacam2	-4.4208	0.0191957	0.501688	9	adjust P-val>=0.01
39	Tnfsfm13	4.72177	0.00326232	0.170216	9	adjust P-val>=0.01
40	Fam89a	-4.5629	0.0195156	0.506196	9	adjust P-val>=0.01
41	Gm13306	5.61913	0.00023	0.0331925	12	adjust P-val>=0.01
42	Ccl27b	-5.26487	0.155278	0.995944	12	adjust P-val>=0.01
43	Gm46340	4.47952	0.0237819	0.654022	12	adjust P-val>=0.01
44	Lcat	4.20784	0.0310858	0.75003	12	adjust P-val>=0.01
45	Rbp2	4.18164	0.0725181	0.995468	12	adjust P-val>=0.01
46	H2ac20	-4.63546	0.218169	0.995944	12	adjust P-val>=0.01
47	Slurp1	4.21888	0.282017	0.995944	12	adjust P-val>=0.01
48	Moap1	6.83776	0.0804423	0.995944	12	adjust P-val>=0.01
49	Hist1h2bq	8.2426	5.68e-11	1.38e-07	12	adjust P-val<0.01
50	Psca	4.29218	0.222896	0.995944	12	adjust P-val>=0.01
51	LOC100861978	5.06103	0.19686	0.999725	15	adjust P-val>=0.01
52	LOC115490184	5.75515	0.141651	0.999725	15	adjust P-val>=0.01
53	Capn11	5.09482	0.000743	0.0707144	15	adjust P-val>=0.01
54	Hist1h4n	-5.20952	0.000718	0.0691158	15	adjust P-val>=0.01
55	Tnfsfm13	-6.05319	1.55e-05	0.00328165	15	adjust P-val<0.01
56	Scgb2b10	-5.93711	5.85e-15	4.77e-12	15	adjust P-val<0.01
57	Scgb2b30	-5.48541	3.6e-62	3.09e-58	15	adjust P-val<0.01
58	Scgb2b12	-5.54793	6.55e-30	1.4e-26	15	adjust P-val<0.01
59	Scgb2b33	-5.48541	3.6e-62	3.09e-58	15	adjust P-val<0.01
60	Nptxr	-5.86479	3.91e-05	0.00667606	15	adjust P-val<0.01
61	LOC102635992	-5.56235	0.000212	0.00626224	18	adjust P-val<0.01
62	Gm45935	6.62828	0.003054	0.0465903	18	adjust P-val>=0.01
63	LOC108167347	5.93056	0.124491	0.511358	18	adjust P-val>=0.01
64	LOC115490184	-5.13277	0.114493	0.488352	18	adjust P-val>=0.01
65	Mmp9	5.19621	0.0955707	0.443473	18	adjust P-val>=0.01
66	Bpifa2	-7.02676	9.14e-08	1.2e-05	18	adjust P-val<0.01
67	Smr3a	-6.06527	3.62e-05	0.00156367	18	adjust P-val<0.01
68	Gal3st3	4.34501	0.206845	0.661343	18	adjust P-val>=0.01
69	Scgb2b10	-6.64734	2.74e-09	6.01e-07	18	adjust P-val<0.01
70	Scgb2b12	-4.44229	6.76e-07	6.25e-05	18	adjust P-val<0.01
71	Hist1h4m	6.06921	0.119284	0.997046	21	adjust P-val>=0.01
72	Esp5	5.27086	0.156133	0.997046	21	adjust P-val>=0.01
73	Gm46340	4.58823	0.217303	0.997046	21	adjust P-val>=0.01
74	Gm46353	5.35051	0.000329	0.0574815	21	adjust P-val>=0.01
75	H2-Q10	-4.4856	0.0121386	0.497762	21	adjust P-val>=0.01
76	Bpifa2	-5.27724	0.17829	0.997046	21	adjust P-val>=0.01
77	Smr3a	-5.599	0.152972	0.997046	21	adjust P-val>=0.01
78	Oas1f	-5.02169	0.00241077	0.193963	21	adjust P-val>=0.01
79	Nptxr	5.60971	0.151961	0.997046	21	adjust P-val>=0.01
80	Spata9	-4.60077	0.00715591	0.375994	21	adjust P-val>=0.01
