# Supplementary material for: Circadian disruption and ROS-NLRP3 signaling mediate sleep deprivation-enhanced silica nanoparticle toxicity in lacrimal glands
Source: J Nanobiotechnology. 2025 Sep 2;23:600. doi: 10.1186/s12951-025-03630-5 (PMC12403269; doi:10.1186/s12951-025-03630-5)
Supplement: Supplementary file 2 — Table S2 [file 12951_2025_3630_MOESM2_ESM.xlsx]

## Sheet: Sheet1
Table S2. Top 10 DEGs in ELGs between SD+SiNPs and NC treatments, including gene names, fold changes, and statistical significance values.
GeneID	Gene Name	log2FC	p_val	p_val_adj	ZT time	Mark
1	Fam205a4	4.97381	0.159917	0.897762	0	adjust P-val>=0.01
2	Gm40514	-4.66036	0.234884	0.98406	0	adjust P-val>=0.01
3	Gm5954	-4.68619	0.0549091	0.598811	0	adjust P-val>=0.01
4	LOC115489888	-4.34881	0.221139	0.967427	0	adjust P-val>=0.01
5	Marco	-4.82252	0.00245343	0.0933133	0	adjust P-val>=0.01
6	Sectm1a	-4.23834	0.0165994	0.306334	0	adjust P-val>=0.01
7	H3c7	-4.21792	0.00608186	0.167607	0	adjust P-val>=0.01
8	H2bc15	5.23964	0.000951	0.0500724	0	adjust P-val>=0.01
9	Tnfsfm13	-4.97618	0.204292	0.95513	0	adjust P-val>=0.01
10	Sirpb1b	4.65152	0.00656721	0.175713	0	adjust P-val>=0.01
11	Sirpb1c	-5.17767	0.00121372	0.147239	3	adjust P-val>=0.01
12	Mup10	-7.99502	5.97e-06	0.00281903	3	adjust P-val<0.01
13	H2-Q9	-6.47614	0.0978023	0.99923	3	adjust P-val>=0.01
14	LOC115489401	-4.46159	0.000206	0.0415438	3	adjust P-val>=0.01
15	LOC115490184	8.02745	1.06e-10	1.4e-07	3	adjust P-val<0.01
16	Aff2	-4.52176	0.000309	0.0550109	3	adjust P-val>=0.01
17	Marco	-4.38002	0.012434	0.571732	3	adjust P-val>=0.01
18	Xlr3a	4.71081	0.00259008	0.230747	3	adjust P-val>=0.01
19	Ubd	-4.88263	0.00187015	0.184907	3	adjust P-val>=0.01
20	Inafm1	5.56916	0.0332591	0.865902	3	adjust P-val>=0.01
21	LOC102635992	-4.28514	0.0253999	0.588275	6	adjust P-val>=0.01
22	Gm2007	7.0902	0.000468	0.0803961	6	adjust P-val>=0.01
23	LOC115489100	-4.33158	0.270403	0.999288	6	adjust P-val>=0.01
24	Ifi44l	-4.40876	0.010912	0.418368	6	adjust P-val>=0.01
25	Ptprn2	5.00013	0.0016384	0.165033	6	adjust P-val>=0.01
26	Ryr1	-4.12213	0.0256527	0.590116	6	adjust P-val>=0.01
27	Xlr3a	-8.19175	0.00267388	0.213573	6	adjust P-val>=0.01
28	Hist1h4n	5.15025	0.153436	0.944068	6	adjust P-val>=0.01
29	Larp6	-4.21065	0.00569713	0.308861	6	adjust P-val>=0.01
30	Pcdhga12	-5.77257	6.59e-05	0.0233832	6	adjust P-val>=0.01
31	Crisp1	5.60576	5.59e-48	1.2e-44	9	adjust P-val<0.01
32	Amy1	10.7875	4.97e-199	8.52e-195	9	adjust P-val<0.01
33	Bcl2a1a	-5.75816	5.6e-05	0.00195514	9	adjust P-val<0.01
34	Bpifa2	14.0925	5.42e-177	4.65e-173	9	adjust P-val<0.01
35	Smr3a	11.7305	3.27e-153	1.87e-149	9	adjust P-val<0.01
36	Xlr3a	5.96261	7.71e-05	0.00251617	9	adjust P-val<0.01
37	Scgb2b30	-6.84098	3.32e-35	4.74e-32	9	adjust P-val<0.01
38	Scgb2b12	-6.46227	1.1e-25	9.43e-23	9	adjust P-val<0.01
39	Scgb2b33	-6.84078	3.25e-35	4.74e-32	9	adjust P-val<0.01
40	Chia1	13.9757	3.83e-38	7.3e-35	9	adjust P-val<0.01
41	Ccl27b	5.37914	0.162574	0.999982	12	adjust P-val>=0.01
42	Eif3j2	-5.01378	0.201129	0.999982	12	adjust P-val>=0.01
43	Esp5	-5.91755	8.11e-05	0.0338591	12	adjust P-val>=0.01
44	Epop	-4.68298	0.0177949	0.831361	12	adjust P-val>=0.01
45	LOC108167347	-4.29184	0.000779	0.155967	12	adjust P-val>=0.01
46	Amy1	7.68354	0.000264	0.0801202	12	adjust P-val>=0.01
47	Kcnj16	4.26931	0.0241869	0.917178	12	adjust P-val>=0.01
48	Bpifa2	9.86913	0.000116	0.0439217	12	adjust P-val>=0.01
49	Smr3a	7.99519	0.00117575	0.198433	12	adjust P-val>=0.01
50	Chia1	9.74063	0.000975	0.176428	12	adjust P-val>=0.01
51	Gm2506	5.19762	0.000163	0.0181002	15	adjust P-val>=0.01
52	Crisp1	-6.29203	4.18e-06	0.000948	15	adjust P-val<0.01
53	Amy1	-11.2601	5.94e-10	4.24e-07	15	adjust P-val<0.01
54	Nos2	-5.24475	0.000167	0.0181283	15	adjust P-val>=0.01
55	Bpifa2	-13.2507	2.84e-11	2.56e-08	15	adjust P-val<0.01
56	Smr3a	-12.1758	1.37e-09	8.41e-07	15	adjust P-val<0.01
57	Hist1h4n	6.26832	0.107261	0.999037	15	adjust P-val>=0.01
58	Tnfsfm13	5.15231	0.188954	0.999037	15	adjust P-val>=0.01
59	Dusp26	-5.34293	0.0396025	0.738973	15	adjust P-val>=0.01
60	Chia1	-12.9473	4.83e-08	2.11e-05	15	adjust P-val<0.01
61	Gm2897	-3.94195	0.0588136	0.520171	18	adjust P-val>=0.01
62	Cd300ld5	5.66039	0.125831	0.71475	18	adjust P-val>=0.01
63	LOC102635992	4.40369	0.0250019	0.340047	18	adjust P-val>=0.01
64	Bmpr1b	-3.98284	0.0388142	0.423243	18	adjust P-val>=0.01
65	Bpifa2	7.14433	4.58e-08	1.86e-05	18	adjust P-val<0.01
66	Smr3a	6.48917	1.93e-06	0.000415	18	adjust P-val<0.01
67	Hsd17b13	4.42115	0.0150751	0.262773	18	adjust P-val>=0.01
68	H3c11	4.42925	0.0165348	0.279676	18	adjust P-val>=0.01
69	Nptxr	-5.27576	0.157738	0.774145	18	adjust P-val>=0.01
70	Gje1	-4.54715	0.00713469	0.174872	18	adjust P-val>=0.01
71	Gm14548	3.98157	0.050587	0.999648	21	adjust P-val>=0.01
72	Mup10	-6.5938	0.0193503	0.753169	21	adjust P-val>=0.01
73	Ccl27b	-5.35373	0.159096	0.999648	21	adjust P-val>=0.01
74	Gm2897	-3.95101	0.0518499	0.999648	21	adjust P-val>=0.01
75	Gm3005	-4.24632	0.00426785	0.345434	21	adjust P-val>=0.01
76	Apoc2	-3.94088	0.035481	0.95576	21	adjust P-val>=0.01
77	Bpifa2	5.62214	0.151335	0.999648	21	adjust P-val>=0.01
78	Smr3a	5.89502	0.132262	0.999648	21	adjust P-val>=0.01
79	Adh6a	3.9095	0.0708955	0.999648	21	adjust P-val>=0.01
80	Nol3	-3.93484	0.0571091	0.999648	21	adjust P-val>=0.01
