# Supplementary material for: Circadian disruption and ROS-NLRP3 signaling mediate sleep deprivation-enhanced silica nanoparticle toxicity in lacrimal glands
Source: J Nanobiotechnology. 2025 Sep 2;23:600. doi: 10.1186/s12951-025-03630-5 (PMC12403269; doi:10.1186/s12951-025-03630-5)
Supplement: Supplementary file 5 — Table S5 [file 12951_2025_3630_MOESM5_ESM.xlsx]

## Sheet: Sheet1
Table S5 KEGG pathways for rhythm genes unique to the NC group.
KEGG Pathway Term ID	KEGG Pathway Term Desc	Term Candidate Gene Num	Total Candidate Gene Num	Term Gene Num	Total Gene Num	Rich Ratio	P value	Q value
4142	Lysosome	18	455	135	8767	0.133333	0.000201	0.0647008
3015	mRNA surveillance pathway	14	455	101	8767	0.138614	0.000679	0.109309
120	Primary bile acid biosynthesis	5	455	18	8767	0.277778	0.0017968	0.192856
100	Steroid biosynthesis	5	455	20	8767	0.25	0.00298352	0.208236
4979	Cholesterol metabolism	8	455	49	8767	0.163265	0.00341025	0.208236
600	Sphingolipid metabolism	8	455	50	8767	0.16	0.00388018	0.208236
4310	Wnt signaling pathway	17	455	169	8767	0.100592	0.00663383	0.291238
603	Glycosphingolipid biosynthesis - globo and isoglobo series	4	455	16	8767	0.25	0.00791239	0.291238
4137	Mitophagy - animal	9	455	68	8767	0.132353	0.00814019	0.291238
4070	Phosphatidylinositol signaling system	11	455	96	8767	0.114583	0.0106798	0.305592
