# Supplementary material for: Circadian disruption and ROS-NLRP3 signaling mediate sleep deprivation-enhanced silica nanoparticle toxicity in lacrimal glands
Source: J Nanobiotechnology. 2025 Sep 2;23:600. doi: 10.1186/s12951-025-03630-5 (PMC12403269; doi:10.1186/s12951-025-03630-5)
Supplement: Supplementary file 6 — Table S6 [file 12951_2025_3630_MOESM6_ESM.xlsx]

## Sheet: Sheet1
Table S6 KEGG pathways for rhythm genes unique to the SiNPs-treated group.
KEGG Pathway Term ID	KEGG Pathway Term Desc	Term Candidate Gene Num	Total Candidate Gene Num	Term Gene Num	Total Gene Num	Rich Ratio	P value	Q value
3010	Ribosome	16	381	142	8767	0.112676	0.000426	0.0849305
563	Glycosylphosphatidylinositol (GPI)-anchor biosynthesis	6	381	26	8767	0.230769	0.000711	0.0849305
3050	Proteasome	8	381	47	8767	0.170213	0.000838	0.0849305
3460	Fanconi anemia pathway	7	381	51	8767	0.137255	0.00614936	0.348342
4141	Protein processing in endoplasmic reticulum	15	381	172	8767	0.0872093	0.0078328	0.348342
4110	Cell cycle	12	381	125	8767	0.096	0.00802104	0.348342
3430	Mismatch repair	4	381	22	8767	0.181818	0.0137912	0.465837
4151	PI3K-Akt signaling pathway	24	381	359	8767	0.0668524	0.0233986	0.547166
250	Alanine, aspartate and glutamate metabolism	5	381	39	8767	0.128205	0.0257918	0.559736
3040	Spliceosome	11	381	132	8767	0.0833333	0.0284437	0.559736
