# Supplementary material for: Circadian disruption and ROS-NLRP3 signaling mediate sleep deprivation-enhanced silica nanoparticle toxicity in lacrimal glands
Source: J Nanobiotechnology. 2025 Sep 2;23:600. doi: 10.1186/s12951-025-03630-5 (PMC12403269; doi:10.1186/s12951-025-03630-5)
Supplement: Supplementary file 7 — Table S7 [file 12951_2025_3630_MOESM7_ESM.xlsx]

## Sheet: Sheet1
Table S7 KEGG pathways for rhythm genes unique to the SD+SiNPs-treated group.
KEGG Pathway Term ID	KEGG Pathway Term Desc	Term Candidate Gene Num	Total Candidate Gene Num	Term Gene Num	Total Gene Num	Rich Ratio	P value	Q value
3030	DNA replication	13	616	35	8767	0.371429	3.13e-07	0.000105
4530	Tight junction	30	616	165	8767	0.181818	1.13e-06	0.00019
4144	Endocytosis	39	616	270	8767	0.144444	1.15e-05	0.00129002
4110	Cell cycle	21	616	125	8767	0.168	0.000149	0.0124862
4720	Long-term potentiation	14	616	67	8767	0.208955	0.000185	0.0124862
4921	Oxytocin signaling pathway	23	616	153	8767	0.150327	0.000402	0.0183935
4015	Rap1 signaling pathway	29	616	214	8767	0.135514	0.000458	0.0183935
4912	GnRH signaling pathway	16	616	90	8767	0.177778	0.000469	0.0183935
280	Valine, leucine and isoleucine degradation	12	616	57	8767	0.210526	0.000491	0.0183935
4919	Thyroid hormone signaling pathway	19	616	120	8767	0.158333	0.000657	0.0201196
