# Supplementary material for: Circadian disruption and ROS-NLRP3 signaling mediate sleep deprivation-enhanced silica nanoparticle toxicity in lacrimal glands
Source: J Nanobiotechnology. 2025 Sep 2;23:600. doi: 10.1186/s12951-025-03630-5 (PMC12403269; doi:10.1186/s12951-025-03630-5)
Supplement: Supplementary file 8 — Table S8 [file 12951_2025_3630_MOESM8_ESM.xlsx]

## Sheet: Sheet1
Table S8 KEGG pathways for shared rhythmic genes among NC, SiNPs, SD+SiNPs treatments.
KEGG Pathway Term ID	KEGG Pathway Term Desc	Term Candidate Gene Num	Total Candidate Gene Num	Term Gene Num	Total Gene Num	Rich Ratio	P value	Q value
4710	Circadian rhythm	11	349	30	8767	0.366667	9.42e-09	2.47e-06
4141	Protein processing in endoplasmic reticulum	25	349	172	8767	0.145349	1.62e-08	2.47e-06
970	Aminoacyl-tRNA biosynthesis	10	349	44	8767	0.227273	6.5e-06	0.000663
280	Valine, leucine and isoleucine degradation	9	349	57	8767	0.157895	0.000375	0.0191394
4216	Ferroptosis	7	349	40	8767	0.175	0.000893	0.0304608
71	Fatty acid degradation	8	349	52	8767	0.153846	0.000945	0.0304608
1240	Biosynthesis of cofactors	15	349	151	8767	0.0993377	0.000971	0.0304608
270	Cysteine and methionine metabolism	8	349	53	8767	0.150943	0.00107493	0.0304608
1230	Biosynthesis of amino acids	10	349	79	8767	0.126582	0.001095	0.0304608
640	Propanoate metabolism	6	349	31	8767	0.193548	0.00120578	0.0307474
