# Supplementary material for: Circadian disruption and ROS-NLRP3 signaling mediate sleep deprivation-enhanced silica nanoparticle toxicity in lacrimal glands
Source: J Nanobiotechnology. 2025 Sep 2;23:600. doi: 10.1186/s12951-025-03630-5 (PMC12403269; doi:10.1186/s12951-025-03630-5)
Supplement: Supplementary file 9 — Table S9 [file 12951_2025_3630_MOESM9_ESM.xlsx]

## Sheet: Sheet1
Table S9 Phase-set enriched pathways in the NC group.
Set ID	Set N	Kuiper p-value (vs. uniform)	Kuiper q-value (vs. uniform)	Vector-average magnitude	Vector-average value
KEGG_CYTOKINE_CYTOKINE_RECEPTOR_INTERACTION	11	0.0194	0.0194	0.62887	9.42348
KEGG_FOCAL_ADHESION	12	0.0002	0.000333333	0.82082	11.038
KEGG_REGULATION_OF_ACTIN_CYTOSKELETON	12	0	0	0.863719	10.0976
KEGG_WNT_SIGNALING_PATHWAY	13	0.0069	0.008625	0.656205	9.83736
KEGG_ENDOCYTOSIS	14	0.0002	0.000333333	0.748608	10.1021
KEGG_MAPK_SIGNALING_PATHWAY	17	0	0	0.765024	12.2149
KEGG_LYSOSOME	17	0	0	0.917602	10.8754
KEGG_PATHWAYS_IN_CANCER	20	0	0	0.747517	9.65789
