# Supplementary material for: Circadian disruption and ROS-NLRP3 signaling mediate sleep deprivation-enhanced silica nanoparticle toxicity in lacrimal glands
Source: J Nanobiotechnology. 2025 Sep 2;23:600. doi: 10.1186/s12951-025-03630-5 (PMC12403269; doi:10.1186/s12951-025-03630-5)
Supplement: Supplementary file 10 — Table S10 [file 12951_2025_3630_MOESM10_ESM.xlsx]

## Sheet: Sheet1
Table S10 Phase-set enriched pathways in the SiNPs-treated group.
Set ID	Set N	Kuiper p-value (vs. uniform)	Kuiper q-value (vs. uniform)	Vector-average magnitude	Vector-average value
KEGG_RIBOSOME	10	0	0	0.977913	9.15
KEGG_SPLICEOSOME	10	0.004	0.008	0.701742	8.05
KEGG_CELL_CYCLE	12	0.0154	0.0231	0.573964	4.83
