# Supplementary material for: Circadian disruption and ROS-NLRP3 signaling mediate sleep deprivation-enhanced silica nanoparticle toxicity in lacrimal glands
Source: J Nanobiotechnology. 2025 Sep 2;23:600. doi: 10.1186/s12951-025-03630-5 (PMC12403269; doi:10.1186/s12951-025-03630-5)
Supplement: Supplementary file 11 — Table S11 [file 12951_2025_3630_MOESM11_ESM.xlsx]

## Sheet: Sheet1
Table S11 Phase-set enriched pathways in the SD+SiNPs-treated group.
Set ID	Set N	Kuiper p-value (vs. uniform)	Kuiper q-value (vs. uniform)	Vector-average magnitude	Vector-average value
LYSOSOME	15	0	0	0.717037	10.5563
CHEMOKINE SIGNALING PATHWAY	25	0	0	0.552394	10.5541
OXIDATIVE PHOSPHORYLATION	11	0	0	0.891386	10.5
GNRH SIGNALING PATHWAY	17	0	0	0.764214	9.99258
INSULIN SIGNALING PATHWAY	20	0	0	0.728505	9.42653
OOCYTE MEIOSIS	12	0	0	0.846589	9.3766
REGULATION OF ACTIN CYTOSKELETON	24	0	0	0.687767	9.28183
LONG TERM POTENTIATION	15	0	0	0.903039	9.21594
MAPK SIGNALING PATHWAY	28	0	0	0.772209	9.21034
ENDOCYTOSIS	24	0	0	0.67873	9.01932
NEUROTROPHIN SIGNALING PATHWAY	14	0	0	0.858598	8.87837
UBIQUITIN MEDIATED PROTEOLYSIS	12	0	0	0.798416	8.71784
TIGHT JUNCTION	20	0	0	0.880433	8.65677
WNT SIGNALING PATHWAY	17	0	0	0.930802	8.45798
PATHWAYS IN CANCER	32	0	0	0.794836	8.10737
VALINE LEUCINE AND ISOLEUCINE DEGRADATION	10	0	0	0.954119	7.93724
AXON GUIDANCE	10	0	0	0.866479	7.52568
CELL CYCLE	21	0	0	0.77393	7.48877
DNA REPLICATION	13	0	0	0.936893	6.65297
FOCAL ADHESION	21	0.0001	0.000533333	0.726164	9.26343
LEUKOCYTE TRANSENDOTHELIAL MIGRATION	17	0.0003	0.0012	0.702178	9.90974
MELANOGENESIS	11	0.0003	0.0012	0.783836	9.27371
GAP JUNCTION	14	0.0003	0.0012	0.691359	9.0926
PURINE METABOLISM	18	0.0003	0.0012	0.541546	8.53664
ERBB SIGNALING PATHWAY	10	0.0003	0.0012	0.846145	7.10519
CYTOKINE CYTOKINE RECEPTOR INTERACTION	17	0.0016	0.00388571	0.547408	12.7422
VASCULAR SMOOTH MUSCLE CONTRACTION	14	0.0017	0.00388571	0.685535	10.1825
NATURAL KILLER CELL MEDIATED CYTOTOXICITY	12	0.0029	0.0058	0.75711	9.81502
JAK STAT SIGNALING PATHWAY	16	0.0047	0.00816	0.643603	9.57383
ADHERENS JUNCTION	10	0.0051	0.00816	0.700672	9.53718
T CELL RECEPTOR SIGNALING PATHWAY	10	0.0089	0.0122667	0.715214	9.75285
B CELL RECEPTOR SIGNALING PATHWAY	11	0.0092	0.0122667	0.548772	12.3713
SPLICEOSOME	11	0.0092	0.0122667	0.613129	9.82849
