# Supplementary material for: Circadian disruption and ROS-NLRP3 signaling mediate sleep deprivation-enhanced silica nanoparticle toxicity in lacrimal glands
Source: J Nanobiotechnology. 2025 Sep 2;23:600. doi: 10.1186/s12951-025-03630-5 (PMC12403269; doi:10.1186/s12951-025-03630-5)
Supplement: Supplementary file 12 — Table S12 [file 12951_2025_3630_MOESM12_ESM.xlsx]

## Sheet: Sheet1
Table S12. KEGG pathways associated with clusters 1–4 unique to NC-treated ELGs, showing pathway names, enrichment scores, and associated biological processes.
KEGG Pathway Term ID	KEGG Pathway Term Desc	KEGG Pathway Term Level1	KEGG Pathway Term Level2	Term Candidate Gene Num	Total Candidate Gene Num	Term Gene Num	Total Gene Num	Rich Ratio	P value	Mark
4142	Lysosome	Cellular Processes	Transport and catabolism	12	189	135	8767	0.0888889	3.25e-05	cluster1
4070	Phosphatidylinositol signaling system	Environmental Information Processing	Signal transduction	9	189	96	8767	0.09375	0.000214	cluster1
511	Other glycan degradation	Metabolism	Glycan biosynthesis and metabolism	4	189	18	8767	0.222222	0.000505	cluster1
4022	cGMP-PKG signaling pathway	Environmental Information Processing	Signal transduction	11	189	173	8767	0.0635838	0.00126512	cluster1
4071	Sphingolipid signaling pathway	Environmental Information Processing	Signal transduction	9	189	124	8767	0.0725806	0.001399	cluster1
4611	Platelet activation	Organismal Systems	Immune system	9	189	124	8767	0.0725806	0.001399	cluster1
3015	mRNA surveillance pathway	Genetic Information Processing	Translation	8	189	101	8767	0.0792079	0.00147004	cluster1
4730	Long-term depression	Organismal Systems	Nervous system	6	189	60	8767	0.1	0.00176568	cluster1
4928	Parathyroid hormone synthesis, secretion and action	Organismal Systems	Endocrine system	8	189	108	8767	0.0740741	0.00225393	cluster1
650	Butanoate metabolism	Metabolism	Carbohydrate metabolism	4	189	28	8767	0.142857	0.00285677	cluster1
4310	Wnt signaling pathway	Environmental Information Processing	Signal transduction	9	139	169	8767	0.0532544	0.00142863	cluster2
603	Glycosphingolipid(GSL) biosynthesis - globo and isoglobo series	Metabolism	Glycan biosynthesis and metabolism	3	139	16	8767	0.1875	0.00187752	cluster2
561	Glycerolipid metabolism	Metabolism	Lipid metabolism	5	139	62	8767	0.0806452	0.00292283	cluster2
100	Steroid biosynthesis	Metabolism	Lipid metabolism	3	139	20	8767	0.15	0.00364901	cluster2
600	Sphingolipid metabolism	Metabolism	Lipid metabolism	4	139	50	8767	0.08	0.00792715	cluster2
120	Primary bile acid biosynthesis	Metabolism	Lipid metabolism	2	139	18	8767	0.111111	0.0323467	cluster2
4390	Hippo signaling pathway	Environmental Information Processing	Signal transduction	6	139	157	8767	0.0382166	0.0385103	cluster2
4979	Cholesterol metabolism	Organismal Systems	Digestive system	3	139	49	8767	0.0612245	0.0423234	cluster2
4146	Peroxisome	Cellular Processes	Transport and catabolism	4	139	86	8767	0.0465116	0.0474174	cluster2
120	Primary bile acid biosynthesis	Metabolism	Lipid metabolism	3	80	18	8767	0.166667	0.000541	cluster3
430	Taurine and hypotaurine metabolism	Metabolism	Metabolism of other amino acids	2	80	13	8767	0.153846	0.00600935	cluster3
4361	Axon regeneration	Organismal Systems	Development and regeneration	4	80	92	8767	0.0434783	0.00979098	cluster3
4010	MAPK signaling pathway	Environmental Information Processing	Signal transduction	7	80	294	8767	0.0238095	0.0174891	cluster3
4625	C-type lectin receptor signaling pathway	Organismal Systems	Immune system	4	80	112	8767	0.0357143	0.0189923	cluster3
4137	Mitophagy - animal	Cellular Processes	Transport and catabolism	3	80	68	8767	0.0441176	0.0239863	cluster3
4621	NOD-like receptor signaling pathway	Organismal Systems	Immune system	5	80	202	8767	0.0247525	0.0369747	cluster3
4140	Autophagy - animal	Cellular Processes	Transport and catabolism	4	80	140	8767	0.0285714	0.0387872	cluster3
51	Fructose and mannose metabolism	Metabolism	Carbohydrate metabolism	2	80	36	8767	0.0555556	0.0424151	cluster3
3060	Protein export	Genetic Information Processing	Folding, sorting and degradation	2	47	29	8767	0.0689655	0.0104162	cluster4
3030	DNA replication	Genetic Information Processing	Replication and repair	2	47	35	8767	0.0571429	0.0149574	cluster4
4613	Neutrophil extracellular trap formation	Organismal Systems	Immune system	4	47	205	8767	0.0195122	0.0236562	cluster4
3460	Fanconi anemia pathway	Genetic Information Processing	Replication and repair	2	47	51	8767	0.0392157	0.0303646	cluster4
