# Supplementary material for: Circadian disruption and ROS-NLRP3 signaling mediate sleep deprivation-enhanced silica nanoparticle toxicity in lacrimal glands
Source: J Nanobiotechnology. 2025 Sep 2;23:600. doi: 10.1186/s12951-025-03630-5 (PMC12403269; doi:10.1186/s12951-025-03630-5)
Supplement: Supplementary file 13 — Table S13 [file 12951_2025_3630_MOESM13_ESM.xlsx]

## Sheet: Sheet1
Table S13. KEGG pathways associated with clusters 1–4 unique to SiNPs-treated ELGs, showing pathway names, enrichment scores, and associated biological processes.
KEGG Pathway Term ID	KEGG Pathway Term Desc	KEGG Pathway Term Level1	KEGG Pathway Term Level2	Term Candidate Gene Num	Total Candidate Gene Num	Term Gene Num	Total Gene Num	Rich Ratio	P value	Mark
563	Glycosylphosphatidylinositol (GPI)-anchor biosynthesis	Metabolism	Glycan biosynthesis and metabolism	3	92	26	8767	0.115385	0.00244136	cluster1
4115	p53 signaling pathway	Cellular Processes	Cell growth and death	4	92	72	8767	0.0555556	0.00678493	cluster1
620	Pyruvate metabolism	Metabolism	Carbohydrate metabolism	3	92	44	8767	0.0681818	0.0108577	cluster1
4350	TGF-beta signaling pathway	Environmental Information Processing	Signal transduction	4	92	95	8767	0.0421053	0.0175105	cluster1
3430	Mismatch repair	Genetic Information Processing	Replication and repair	2	92	22	8767	0.0909091	0.021957	cluster1
640	Propanoate metabolism	Metabolism	Carbohydrate metabolism	2	92	31	8767	0.0645161	0.0415986	cluster1
4110	Cell cycle	Cellular Processes	Cell growth and death	4	92	125	8767	0.032	0.0421531	cluster1
4215	Apoptosis - multiple species	Cellular Processes	Cell growth and death	2	92	32	8767	0.0625	0.0440751	cluster1
3050	Proteasome	Genetic Information Processing	Folding, sorting and degradation	4	54	47	8767	0.0851064	0.000188	cluster2
4612	Antigen processing and presentation	Organismal Systems	Immune system	5	54	88	8767	0.0568182	0.000195	cluster2
4130	SNARE interactions in vesicular transport	Genetic Information Processing	Folding, sorting and degradation	2	54	33	8767	0.0606061	0.0174033	cluster2
4514	Cell adhesion molecules	Environmental Information Processing	Signaling molecules and interaction	4	54	171	8767	0.0233918	0.0207404	cluster2
4071	Sphingolipid signaling pathway	Environmental Information Processing	Signal transduction	3	54	124	8767	0.0241935	0.0406401	cluster2
4152	AMPK signaling pathway	Environmental Information Processing	Signal transduction	3	54	126	8767	0.0238095	0.0422937	cluster2
4141	Protein processing in endoplasmic reticulum	Genetic Information Processing	Folding, sorting and degradation	8	112	172	8767	0.0465116	0.00156828	cluster3
3050	Proteasome	Genetic Information Processing	Folding, sorting and degradation	4	112	47	8767	0.0851064	0.00295007	cluster3
4145	Phagosome	Cellular Processes	Transport and catabolism	7	112	180	8767	0.0388889	0.0081247	cluster3
250	Alanine, aspartate and glutamate metabolism	Metabolism	Amino acid metabolism	3	112	39	8767	0.0769231	0.0132841	cluster3
4214	Apoptosis - fly	Cellular Processes	Cell growth and death	3	112	50	8767	0.06	0.0257614	cluster3
230	Purine metabolism	Metabolism	Nucleotide metabolism	5	112	133	8767	0.037594	0.0275283	cluster3
900	Terpenoid backbone biosynthesis	Metabolism	Metabolism of terpenoids and polyketides	2	112	23	8767	0.0869565	0.0343668	cluster3
4977	Vitamin digestion and absorption	Organismal Systems	Digestive system	2	112	24	8767	0.0833333	0.0371839	cluster3
4151	PI3K-Akt signaling pathway	Environmental Information Processing	Signal transduction	9	112	359	8767	0.0250696	0.0398552	cluster3
3010	Ribosome	Genetic Information Processing	Translation	16	123	142	8767	0.112676	1.04e-10	cluster4
3040	Spliceosome	Genetic Information Processing	Transcription	8	123	132	8767	0.0606061	0.000515	cluster4
4114	Oocyte meiosis	Cellular Processes	Cell growth and death	7	123	121	8767	0.0578512	0.00151919	cluster4
3460	Fanconi anemia pathway	Genetic Information Processing	Replication and repair	4	123	51	8767	0.0784314	0.00554495	cluster4
4110	Cell cycle	Cellular Processes	Cell growth and death	6	123	125	8767	0.048	0.00815562	cluster4
4914	Progesterone-mediated oocyte maturation	Organismal Systems	Endocrine system	5	123	92	8767	0.0543478	0.00933285	cluster4
3020	RNA polymerase	Genetic Information Processing	Transcription	3	123	32	8767	0.09375	0.00993693	cluster4
4212	Longevity regulating pathway - worm	Organismal Systems	Aging	5	123	94	8767	0.0531915	0.0101901	cluster4
190	Oxidative phosphorylation	Metabolism	Energy metabolism	5	123	122	8767	0.0409836	0.0283078	cluster4
