# Supplementary material for: Circadian disruption and ROS-NLRP3 signaling mediate sleep deprivation-enhanced silica nanoparticle toxicity in lacrimal glands
Source: J Nanobiotechnology. 2025 Sep 2;23:600. doi: 10.1186/s12951-025-03630-5 (PMC12403269; doi:10.1186/s12951-025-03630-5)
Supplement: Supplementary file 14 — Table S14 [file 12951_2025_3630_MOESM14_ESM.xlsx]

## Sheet: Sheet1
Table S14. KEGG pathways associated with clusters 1–4 unique to SD+SiNPs-treated ELGs, showing pathway names, enrichment scores, and associated biological processes.
KEGG Pathway Term ID	KEGG Pathway Term Desc	KEGG Pathway Term Level1	KEGG Pathway Term Level2	Term Candidate Gene Num	Total Candidate Gene Num	Term Gene Num	Total Gene Num	Rich Ratio	P value	Mark
4530	Tight junction	Cellular Processes	Cellular community - eukaryotes	10	131	165	8767	0.0606061	0.000173	cluster1
4015	Rap1 signaling pathway	Environmental Information Processing	Signal transduction	9	131	214	8767	0.0420561	0.00469571	cluster1
4066	HIF-1 signaling pathway	Environmental Information Processing	Signal transduction	6	131	114	8767	0.0526316	0.00710297	cluster1
4919	Thyroid hormone signaling pathway	Organismal Systems	Endocrine system	6	131	120	8767	0.05	0.0090511	cluster1
4911	Insulin secretion	Organismal Systems	Endocrine system	5	131	86	8767	0.0581395	0.0091534	cluster1
4912	GnRH signaling pathway	Organismal Systems	Endocrine system	5	131	90	8767	0.0555556	0.0110203	cluster1
4921	Oxytocin signaling pathway	Organismal Systems	Endocrine system	6	131	153	8767	0.0392157	0.0269332	cluster1
190	Oxidative phosphorylation	Metabolism	Energy metabolism	5	131	122	8767	0.0409836	0.0357604	cluster1
4630	JAK-STAT signaling pathway	Environmental Information Processing	Signal transduction	6	131	168	8767	0.0357143	0.0398532	cluster1
4024	cAMP signaling pathway	Environmental Information Processing	Signal transduction	7	131	220	8767	0.0318182	0.0465726	cluster1
4720	Long-term potentiation	Organismal Systems	Nervous system	9	219	67	8767	0.134328	3.9e-05	cluster2
4144	Endocytosis	Cellular Processes	Transport and catabolism	18	219	270	8767	0.0666667	0.000138	cluster2
4218	Cellular senescence	Cellular Processes	Cell growth and death	14	219	182	8767	0.0769231	0.000179	cluster2
4015	Rap1 signaling pathway	Environmental Information Processing	Signal transduction	15	219	214	8767	0.0700935	0.000294	cluster2
280	Valine, leucine and isoleucine degradation	Metabolism	Amino acid metabolism	7	219	57	8767	0.122807	0.000504	cluster2
640	Propanoate metabolism	Metabolism	Carbohydrate metabolism	5	219	31	8767	0.16129	0.000929	cluster2
20	Citrate cycle (TCA cycle)	Metabolism	Carbohydrate metabolism	5	219	32	8767	0.15625	0.00107901	cluster2
4540	Gap junction	Cellular Processes	Cellular community - eukaryotes	8	219	86	8767	0.0930233	0.00132807	cluster2
4520	Adherens junction	Cellular Processes	Cellular community - eukaryotes	7	219	71	8767	0.0985915	0.00188902	cluster2
4360	Axon guidance	Organismal Systems	Development and regeneration	12	219	181	8767	0.0662983	0.00190135	cluster2
4061	Viral protein interaction with cytokine and cytokine receptor	Environmental Information Processing	Signaling molecules and interaction	6	100	94	8767	0.0638298	0.000686	cluster3
240	Pyrimidine metabolism	Metabolism	Nucleotide metabolism	4	100	58	8767	0.0689655	0.00422001	cluster3
4062	Chemokine signaling pathway	Organismal Systems	Immune system	6	100	191	8767	0.0314136	0.0217632	cluster3
4144	Endocytosis	Cellular Processes	Transport and catabolism	7	100	270	8767	0.0259259	0.034342	cluster3
4060	Cytokine-cytokine receptor interaction	Environmental Information Processing	Signaling molecules and interaction	7	100	291	8767	0.024055	0.0482135	cluster3
3030	DNA replication	Genetic Information Processing	Replication and repair	12	166	35	8767	0.342857	8.16e-13	cluster4
4110	Cell cycle	Cellular Processes	Cell growth and death	13	166	125	8767	0.104	6.13e-07	cluster4
3420	Nucleotide excision repair	Genetic Information Processing	Replication and repair	7	166	43	8767	0.162791	1.4e-05	cluster4
3018	RNA degradation	Genetic Information Processing	Folding, sorting and degradation	8	166	82	8767	0.097561	0.000151	cluster4
3410	Base excision repair	Genetic Information Processing	Replication and repair	5	166	34	8767	0.147059	0.000409	cluster4
3430	Mismatch repair	Genetic Information Processing	Replication and repair	4	166	22	8767	0.181818	0.000695	cluster4
3440	Homologous recombination	Genetic Information Processing	Replication and repair	5	166	41	8767	0.121951	0.000989	cluster4
3013	Nucleocytoplasmic transport	Genetic Information Processing	Translation	8	166	116	8767	0.0689655	0.00156673	cluster4
