# Supplementary material for: Circadian disruption and ROS-NLRP3 signaling mediate sleep deprivation-enhanced silica nanoparticle toxicity in lacrimal glands
Source: J Nanobiotechnology. 2025 Sep 2;23:600. doi: 10.1186/s12951-025-03630-5 (PMC12403269; doi:10.1186/s12951-025-03630-5)
Supplement: Supplementary file 15 — Table S15 [file 12951_2025_3630_MOESM15_ESM.xlsx]

## Sheet: Sheet1
Table S15 . Results of two-way repeated measures ANOVA of Core Clock Genes
	Group × Time Interaction	Group Main Effect	Time Main Effect
Nr1d1	S (F = 5.601, P < 0.001)	S (F = 169.2, P < 0.001)	NS(F = 1.623, P =0.2733)
Nr1d2	S (F = 4.317, P =0.0001)	S (F = 1210.7, P < 0.0001)	S (F = 6.309, P =0.0335)
CLOCK	S (F = 3.951, P = 0.0003)	S (F = 16.41, P < 0.0001)	S (F = 15.84, P = 0.004)
Arntl	S (F = 2.473, P =0.0119)	S (F = 213.3, P < 0.0001)	NS(F = 0.4212, P =0.6743)
Per1	S (F = 2.070, P < 0.0350)	S (F = 127.54, P < 0.0001)	NS(F = 3.568, P =0.0953)
Per2	S (F = 2.118, P =0.0307)	S (F = 128.0, P < 0.0001)	S (F = 19.63, P =0.0023)
Per3	NS(F = 1.802, P=0.0708)	S (F = 130.4, P =0.0986)	NS(F = 3.493, P =0.0986)
Cry1	S (F = 3.294, P =0.0014)	S (F = 43.58, P < 0.0001)	NS(F = 1.704, P < 0.1594)
Cry2	NS(F = 1.917, P =0.0524)	S (F = 17.14, P < 0.0001)	NS(F = 4.858, P =0.0557)
Npas2	NS(F =0.9275 , P =0.5384)	S (F = 34.11, P < 0.0001)	NS(F = 2.233, P =0.1884)
Rora	S (F = 4.203, P =0.0001)	S (F = 15.48, P < 0.0001)	NS(F = 3.144, P =0.1164)
Rorc	S (F = 0.0107, P =0.0107)	S (F = 50.09, P < 0.0001)	S (F = 6.596, P =0.306)
	S: Significant, P<0.05
	NS:Not significant P≥0.05
	Data of Arntl and Per1 was log-transformed using the natural logarithm (ln) to improve normality before statistical analysis.
